# Supplementary material
Source: PubMed Central journal article supplement (PMC3389975)
Supplement: supp_112.140301_140301SI.pdf [file supp_112.140301_140301SI.pdf]

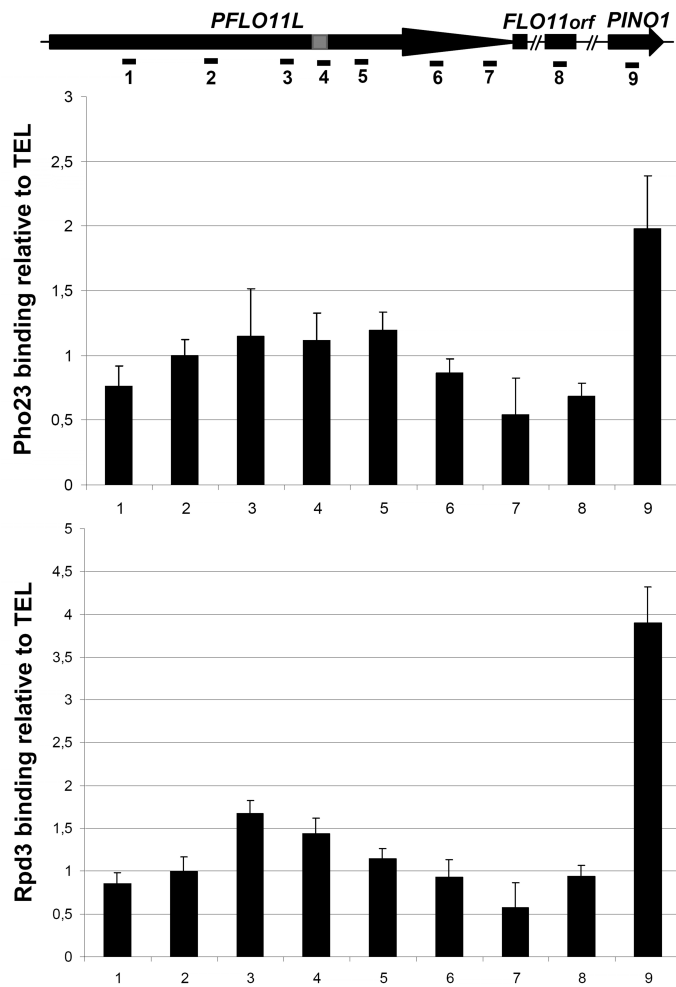

**Figure S1** Pho23 and Rpd3 weakly bind the *FLO11* promoter. Pho23-13Myc or Rpd3-13Myc binding at *FLO11* promoter was measured by CHIP analysis and quantificated by qRT-PCR using amplicons over the promoter and open reading frame. Data are showed relative to a telomeric internal control (TEL). An amplicon of a region of the *INO1* promoter has been used as a positive control. Error bars represent the standard deviation of three biologically independent measurements. Diagrams at the top of the panels show amplicon positions. The gray box in the *FLO11* promoter corresponds to the 111 bp region that is deleted in the *flor* promoter allele.

**Table S1 Primers used for qRT-PCR.**

| Primers       | Sequence                   | Used for amplicon<br>(Figure 3) |
|---------------|----------------------------|---------------------------------|
| PFLO11ChIP5   | ATGCCTTATAGCAACCAAGAAGCT   | 1                               |
| PFLO11ChIP6   | TGGCGCTGTTCATTCCAAT        | 1                               |
| PFLO11ChIP15  | TCCCCTAATGTATCCCTCATTCA    | 2                               |
| PFLO11ChIP16  | GCTCGGCTCTCGATGAGAAT       | 2                               |
| PFLO11ChIP1   | TCCACCACATGAAACCTGCTACT    | 3                               |
| PFLO11ChIP2   | AAATCTCACCCGTGGATCCTT      | 3                               |
| 133dPFLO11u1  | GATCTTTTCTGGCTCCAATAGG     | 4                               |
| 133dPFLO11u2  | GCCCCAGAGAAGGACTAAAGACA    | 4                               |
| LPFLO11sfl1u1 | AGTTTCTCGGAATGTGGCATTAC    | 4                               |
| LPFLO11sfl1u2 | GGAAAATAACGGCCGAACTCT      | 4                               |
| PFLO11FChIP17 | AAAATTAGGCTTCACTGGTACGAGTT | 5                               |
| PFLO11FChIP18 | CTAAACGCTCGGACTGATTGC      | 5                               |
| PFLO11LChIP17 | GAGTTTCGGCCGTATTTTCC       | 5                               |
| PFLO11LChIP18 | AGTCCATTCTTAGCCCCAAAGAA    | 5                               |
| PFLO11ChIP3   | TTGCCTATCGGTGGTGTGATT      | 6                               |
| PFLO11ChIP4   | GGCACTTTTAGGGTTGGGCAAT     | 6                               |
| PFLO11FChIP19 | ATCTGAGGAATGTCCGTGTTCA     | 7                               |
| PFLO11FChIP20 | AACCCTTCAACAATTGTACTGGTAA  | 7                               |
| PFLO11LChIP19 | TGAGGAATGTCCGTGTTCGA       | 7                               |
| PFLO11LChIP20 | TGGGAACCCTTCAACAATTTGT     | 7                               |
| PFLO11orf1    | CACCAGTAACTCCTGCCACTAATG   | 8                               |
| PFLO11orf2    | TGCGCTTGCAACTTACGA         | 8                               |
| PIno1RT1      | GAAATATGCGGAGGCCAAGTAT     | 9                               |
| PIno1RT2      | TGCGCTTCTCTGCTCCAT         | 9                               |
| TEL1aRT       | GCGTAACAAAGCCATAATGCCTCC   | for normalization               |
| TEL1bRT       | CTCGTTAGGATCACGTTCGAATCC   | for normalization               |
| FLO11RT1      | CACCAGTAACTCCTGCCACTAATG   |                                 |
| FLO11RT2      | TGCGCTTGCAACTTACGA         |                                 |
| SFL1RT1       | CCGGCACATGTACCAAACCTT      |                                 |
| SFL1RT2       | CCCGGTTTGTGTTATTTTTCG      |                                 |
| ICR1RT1       | TTGCCTATCGGTGGTGTGATT      |                                 |
| ICR1RT2       | GGCACTTTTAGGGTTGGGCAAT     |                                 |
| SCR1RT1       | AGCAAAGGTGACCCGTGATG       |                                 |
| SCR1RT2       | CTGATGGCACCGCCAAT          |                                 |
