# Supplementary material
Source: PubMed Central journal article supplement (PMC3389975)
Supplement: supp_112.140301_FigureS1.pdf [file supp_112.140301_FigureS1.pdf]

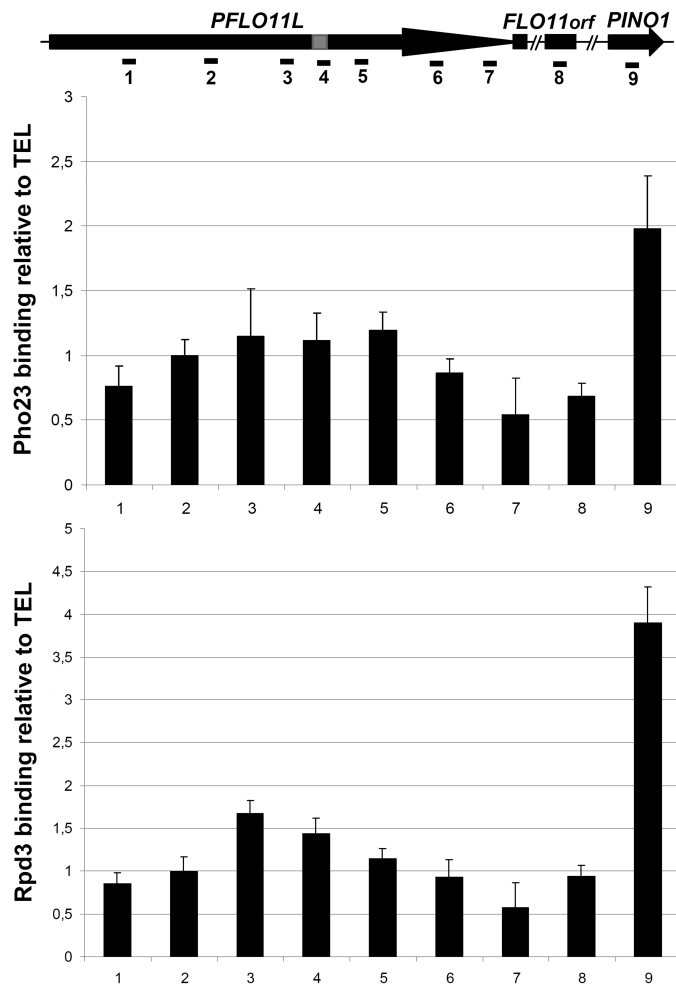

**Figure S1** Pho23 and Rpd3 weakly bind the *FLO11* promoter. Pho23-13Myc or Rpd3-13Myc binding at *FLO11* promoter was measured by CHIP analysis and quantificated by qRT-PCR using amplicons over the promoter and open reading frame. Data are showed relative to a telomeric internal control (TEL). An amplicon of a region of the *INO1* promoter has been used as a positive control. Error bars represent the standard deviation of three biologically independent measurements. Diagrams at the top of the panels show amplicon positions. The gray box in the *FLO11* promoter corresponds to the 111 bp region that is deleted in the *flor* promoter allele.
