# Supplementary material
Source: PubMed Central journal article supplement (PMC3389975)
Supplement: supp_112.140301_TableS1.pdf [file supp_112.140301_TableS1.pdf]

**Table S1 Primers used for qRT-PCR.**

| Primers       | Sequence                   | Used for amplicon<br>(Figure 3) |
|---------------|----------------------------|---------------------------------|
| PFLO11ChIP5   | ATGCCTTATAGCAACCAAGAAGCT   | 1                               |
| PFLO11ChIP6   | TGGCGCTGTTCATTCCAAT        | 1                               |
| PFLO11ChIP15  | TCCCCTAATGTATCCCTCATTCA    | 2                               |
| PFLO11ChIP16  | GCTCGGCTCTCGATGAGAAT       | 2                               |
| PFLO11ChIP1   | TCCACCACATGAAACCTGCTACT    | 3                               |
| PFLO11ChIP2   | AAATCTCACCCGTGGATCCTT      | 3                               |
| 133dPFLO11u1  | GATCTTTTCTGGCTCCAATAGG     | 4                               |
| 133dPFLO11u2  | GCCCCAGAGAAGGACTAAAGACA    | 4                               |
| LPFLO11sfl1u1 | AGTTTCTCGGAATGTGGCATTAC    | 4                               |
| LPFLO11sfl1u2 | GGAAAATAACGGCCGAACTCT      | 4                               |
| PFLO11FChIP17 | AAAATTAGGCTTCACTGGTACGAGTT | 5                               |
| PFLO11FChIP18 | CTAAACGCTCGGACTGATTGC      | 5                               |
| PFLO11LChIP17 | GAGTTTCGGCCGTTATTTCC       | 5                               |
| PFLO11LChIP18 | AGTCCATTCTTAGCCCCAAAGAA    | 5                               |
| PFLO11ChIP3   | TTGCCTATCGGTGGTGTGATT      | 6                               |
| PFLO11ChIP4   | GGCACTTTTAGGGTTGGGCAAT     | 6                               |
| PFLO11FChIP19 | ATCTGAGGAATGTCCGTGTTCA     | 7                               |
| PFLO11FChIP20 | AACCCTTCAACAACCTGTACTGGTAA | 7                               |
| PFLO11LChIP19 | TGAGGAATGTCCGTGTTCGA       | 7                               |
| PFLO11LChIP20 | TGGGAACCCTTCAACAATTTGT     | 7                               |
| PFLO11orf1    | CACCAGTAACTCCTGCCACTAATG   | 8                               |
| PFLO11orf2    | TGCGCTTGCAGAACCTACGA       | 8                               |
| PIno1RT1      | GAAATATGCGGAGGCCAAGTAT     | 9                               |
| PIno1RT2      | TGCGCTTCTCTGCTCCAT         | 9                               |
| TEL1aRT       | GCGTAACAAAGCCATAATGCCTCC   | for normalization               |
| TEL1bRT       | CTCGTTAGGATCACGTTCGAATCC   | for normalization               |
| FLO11RT1      | CACCAGTAACTCCTGCCACTAATG   |                                 |
| FLO11RT2      | TGCGCTTGCAGAACCTACGA       |                                 |
| SFL1RT1       | CCGGCACATGTACCAAACCTT      |                                 |
| SFL1RT2       | CCCGGTTTGTGTTATTTTCG       |                                 |
| ICR1RT1       | TTGCCTATCGGTGGTGTGATT      |                                 |
| ICR1RT2       | GGCACTTTTAGGGTTGGGCAAT     |                                 |
| SCR1RT1       | AGCAAAGGTGACCCGTGATG       |                                 |
| SCR1RT2       | CTGATGGCACCGCCAAT          |                                 |
